# Supplementary material
Source: PubMed Central journal article supplement (PMC2640233)

## A Dephosphorylated ORC

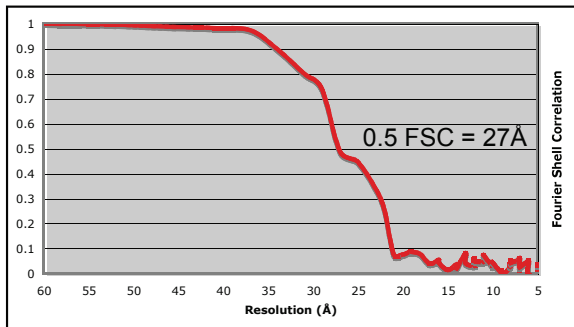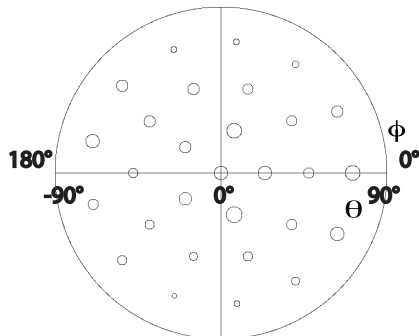

## B Dephosphorylated ORC + ATP

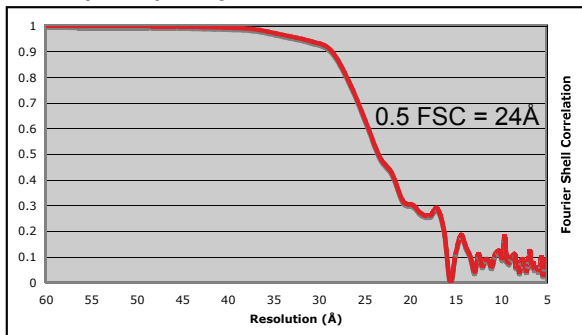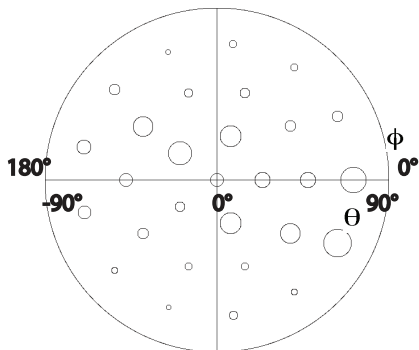

## C Hyperphosphorylated ORC + ATP

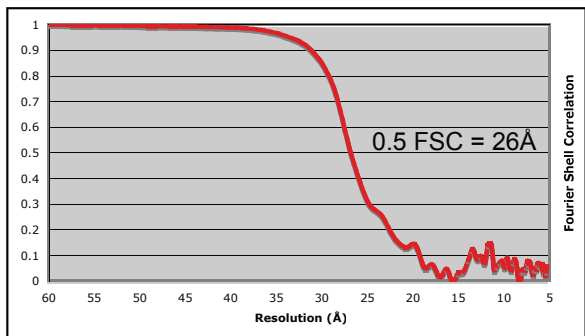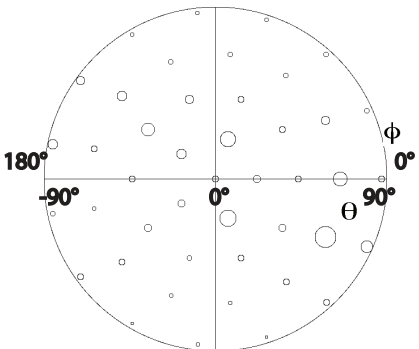

Supplement: NIHMS83489-supplement-2.pdf [file NIHMS83489-supplement-2.pdf]

### A Dephosphorylated ORC

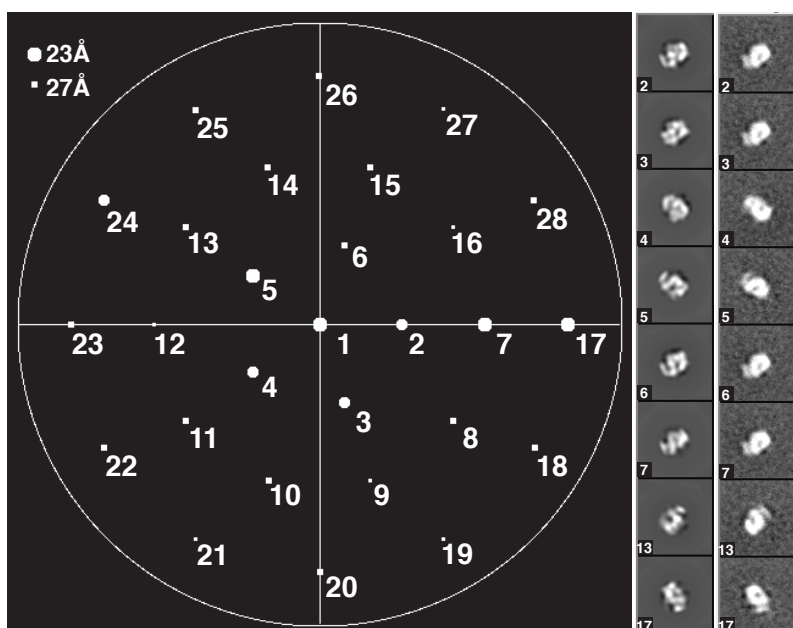

### B Dephosphorylated ORC + ATP

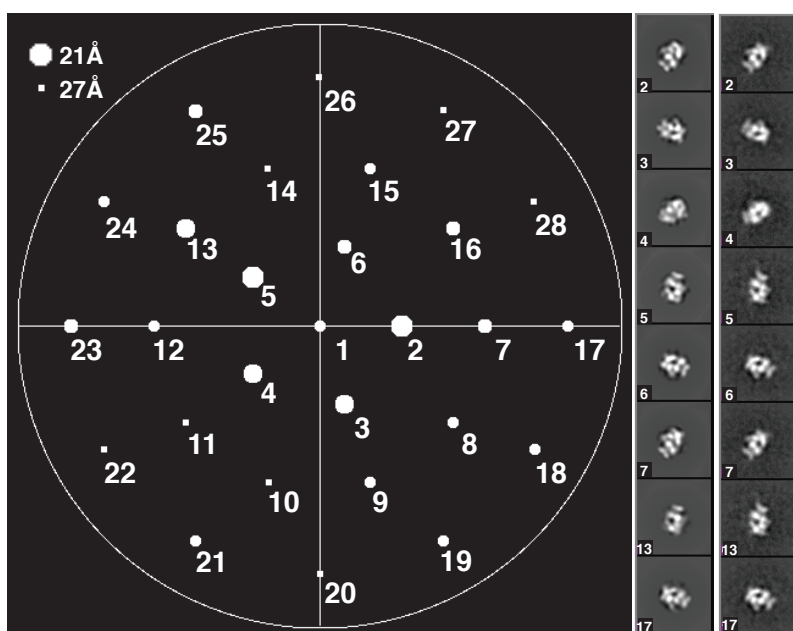

### C Hyperphosphorylated ORC + ATP

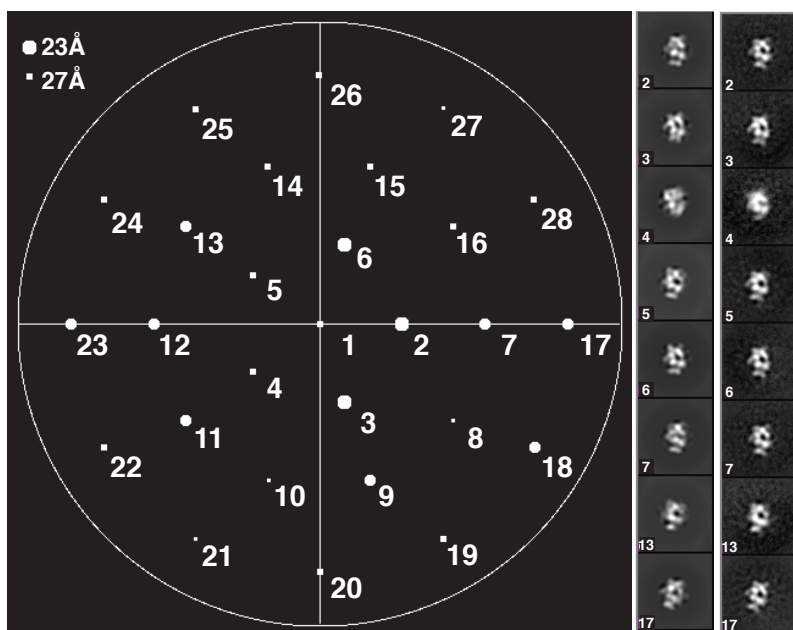

Supplement: NIHMS83489-supplement-3.pdf [file NIHMS83489-supplement-3.pdf]
